# Supplementary material for: Heteroleptic cobalt complex augments antifungal activity with fluconazole and causes membrane disruption in Candida albicans
Source: Royal Society of Chemistry journal article supplement (doi:10.1039/d4dt01209g), 2024-01-01
Supplement: d4dt01209g1.pdf [file d4dt01209g1.pdf]

## Supplementary information

### **Heteroleptic Cobalt Complex Augments Antifungal Activity with Fluconazole and Causes Membrane Disruption in *Candida albicans***

**Ovas Ahmad Dar<sup>1,2</sup>, Athar Adil Hashmi<sup>1</sup>, Abdullah Saad Al-Bogami<sup>3</sup>, Aijaz Ahmad<sup>4,5\*</sup> and Mohmmad Younus Wani<sup>3\*</sup>,**

<sup>1</sup>*Department of Chemistry, Jamia Millia Islamia, New Delhi 110025, India*

<sup>2</sup>*College of Pharmaceutical Sciences Southwest University Chongqing, 400175, China*

<sup>3</sup>*Department of Chemistry, College of Science, University of Jeddah, 21589 Jeddah, Saudi Arabia*

<sup>4</sup>*Clinical Microbiology and Infectious Diseases, School of Pathology, Faculty of Health Sciences, University of the Witwatersrand, Johannesburg, 2193, South Africa*

<sup>5</sup>*Division of Pulmonary, Allergy, and Critical Care Medicine, Department of Medicine, University of Pittsburgh Medical Center; Pittsburgh, PA 15213, USA*

\*Correspondence: [mwani@uj.edu.sa](mailto:mwani@uj.edu.sa) (MYW); [aijaz.ahmad@wits.ac.za](mailto:aijaz.ahmad@wits.ac.za) (AA)

#### **Figure captions**

**Figure S1** FT-IR spectrum of **C2** complex

**Figure S2** FT-IR spectrum of **C3** complex

**Figure S3** Mass spectrum of Schiff base ligand (**L**)

**Figure S4** Mass spectrum of **C1** complex

**Figure S5** Mass spectrum of **C2** complex

**Figure S6** Mass spectrum of **C3** complex

**Figure S7** <sup>13</sup>C NMR spectrum of Schiff base (**L**)

**Figure S8** <sup>13</sup>C NMR spectrum of **C3** complex

**Figure S9** Powder X-ray diffraction pattern of **C2** complex

**Figure S10** Powder X-ray diffraction pattern of **C3** complex

**Figure S11** TGA and DTG curves of **C2** complex

**Figure S12** TGA and DTG curves of **C3** complex

**Table S1.** Detailed XRD parameters of complexes (**C1-C3**)

**Table S2.** Fractional inhibitory concentration index of ligand (**L**) and its complexes (**C1-C3**) with fluconazole

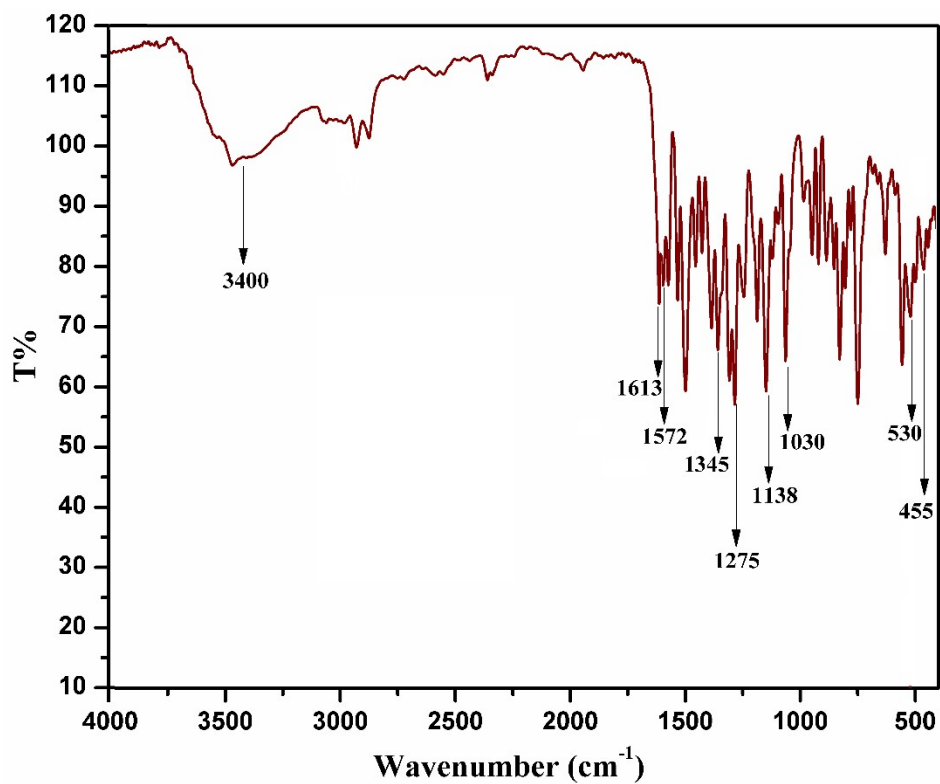

Figure S1 FT-IR spectrum of C2 complex

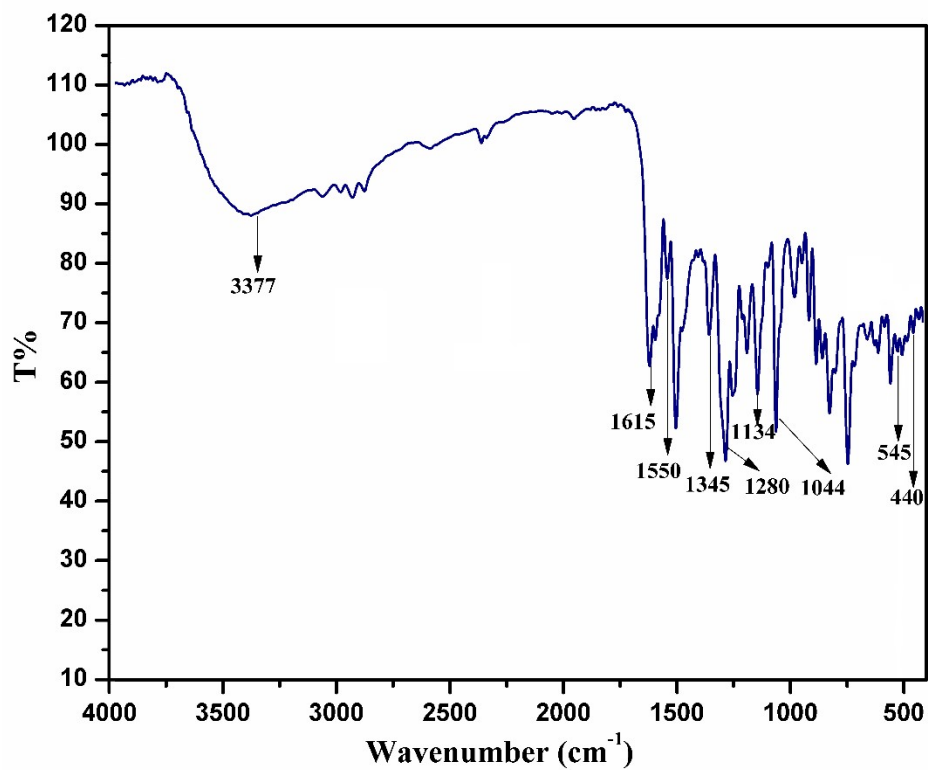

Figure S2 FT-IR spectrum of C3 complex

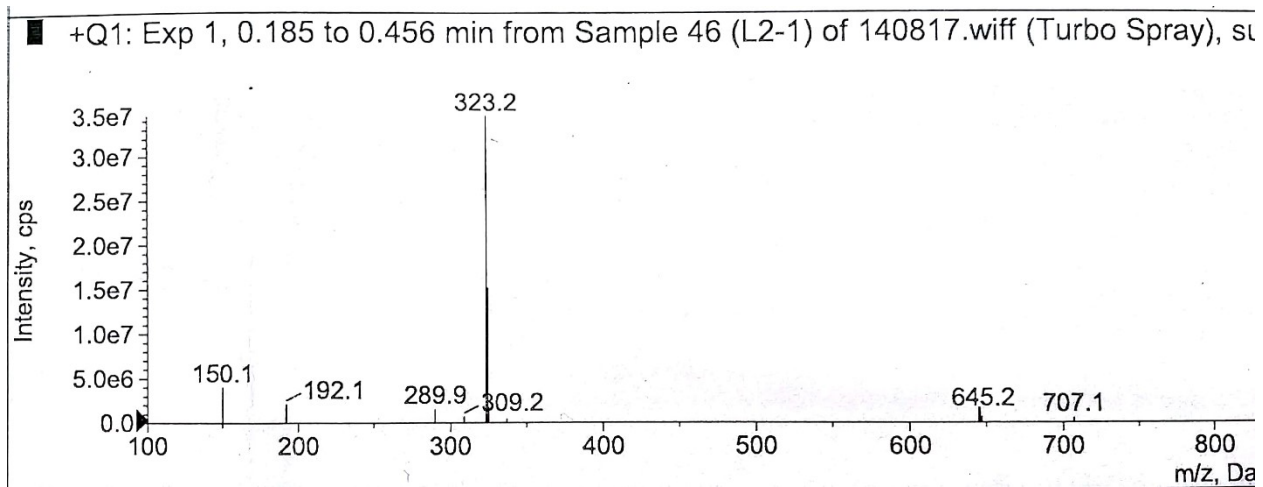

**Figure S3** Mass spectrum of schiff base ligand (**L**) showing prominent parent ion peak at 323.2 (m/z) which corresponds to  $[M+H]^+$

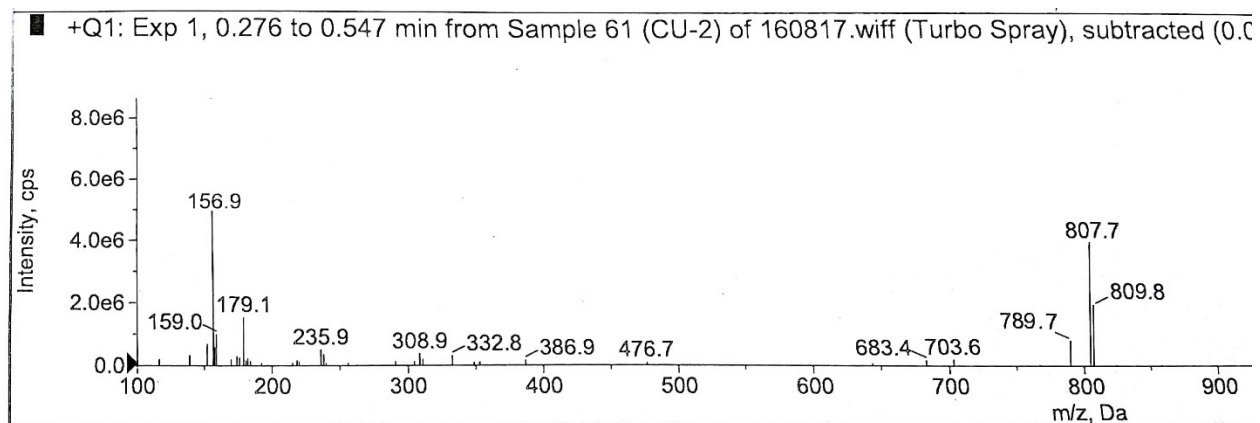

**Figure S4** Mass spectrum of complex **C1** complex showing prominent parent ion peak at 807.7 (m/z) which corresponds to  $[M+H]^+$

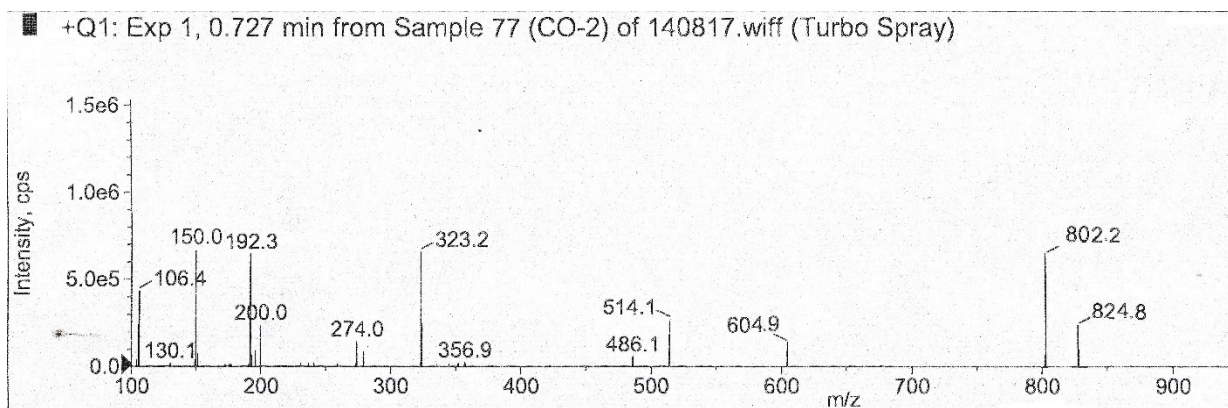

**Figure S5** Mass spectrum of **C2** complex showing prominent parent ion peak at 802.2 (m/z) which corresponds to  $[M+H]^+$

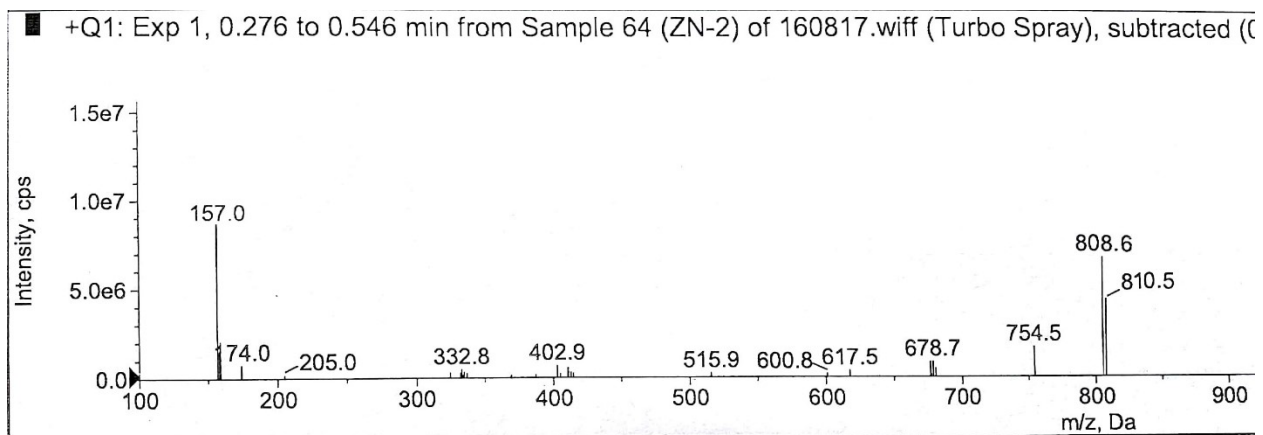

**Figure S6** Mass spectrum of **C3** complex showing prominent parent ion peak at 808.6 (m/z) which corresponds to  $[M+H]^+$

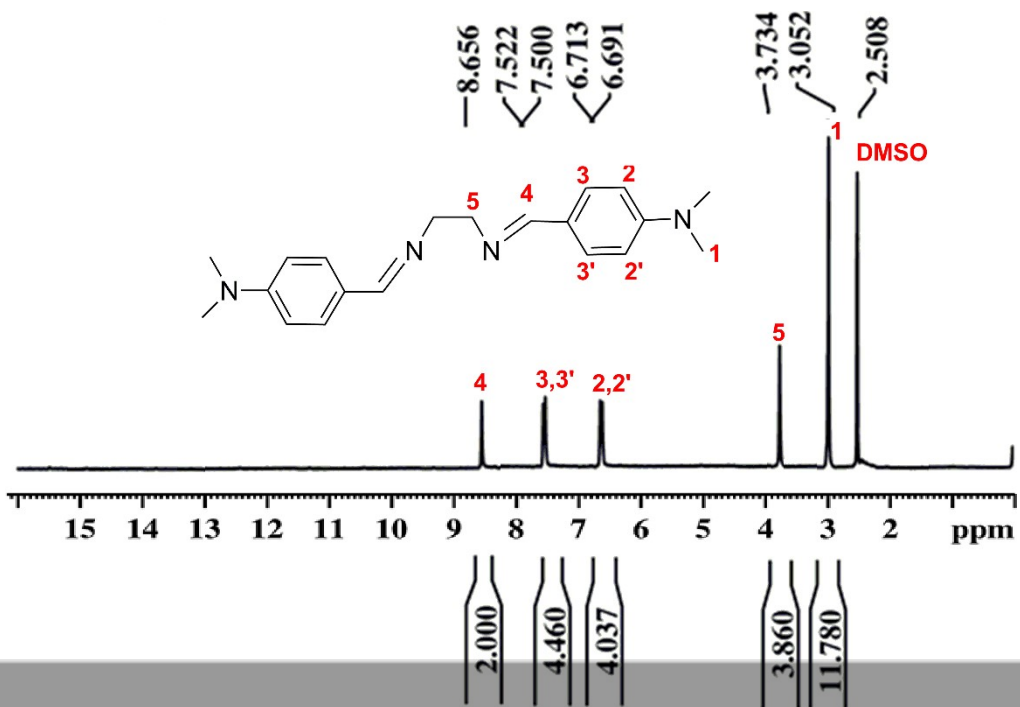

Fig. S7. <sup>1</sup>H NMR spectrum of the schiff base ligand (L)

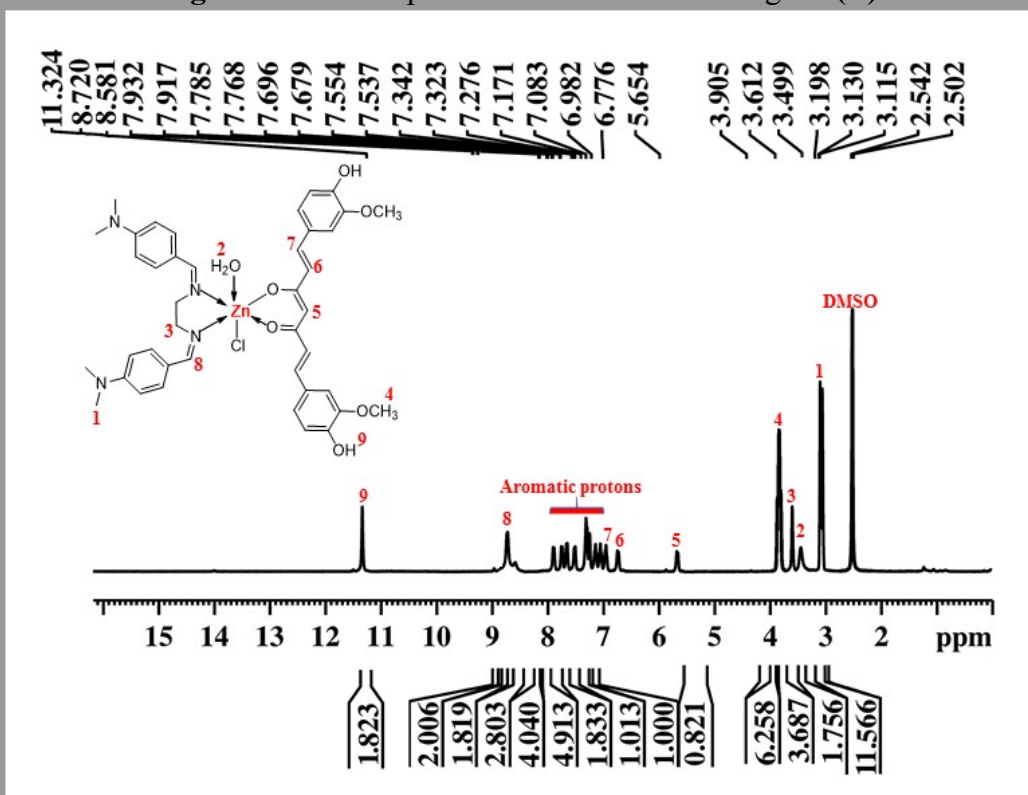

Fig. S8. <sup>1</sup>H NMR spectra of C3 complex.

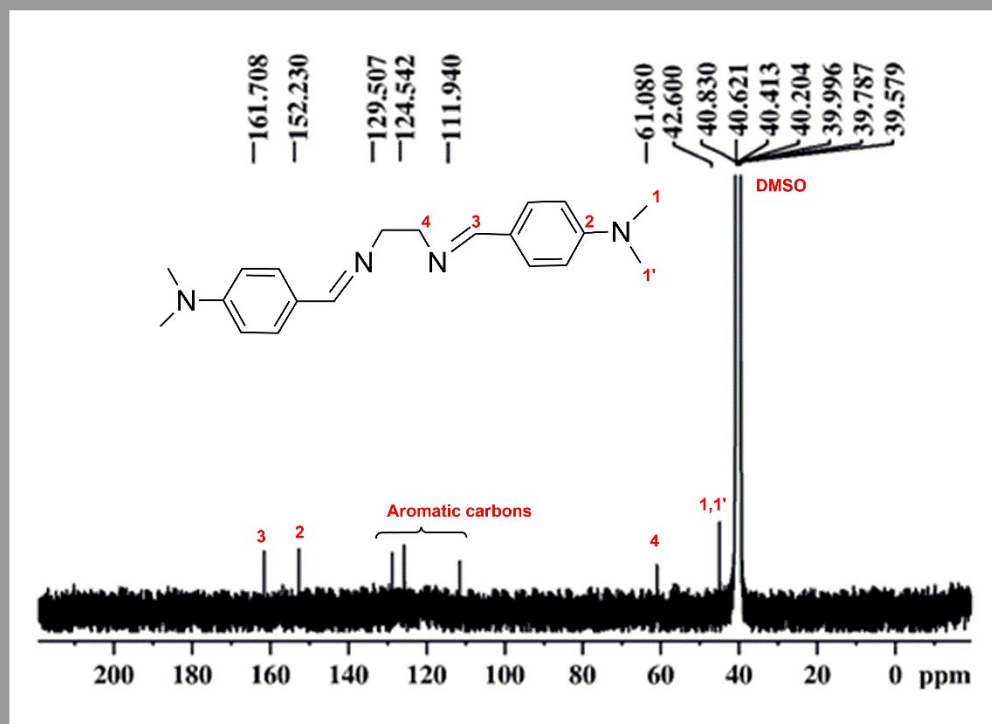

Figure S9  $^{13}\text{C}$  NMR spectrum of Schiff base (L)

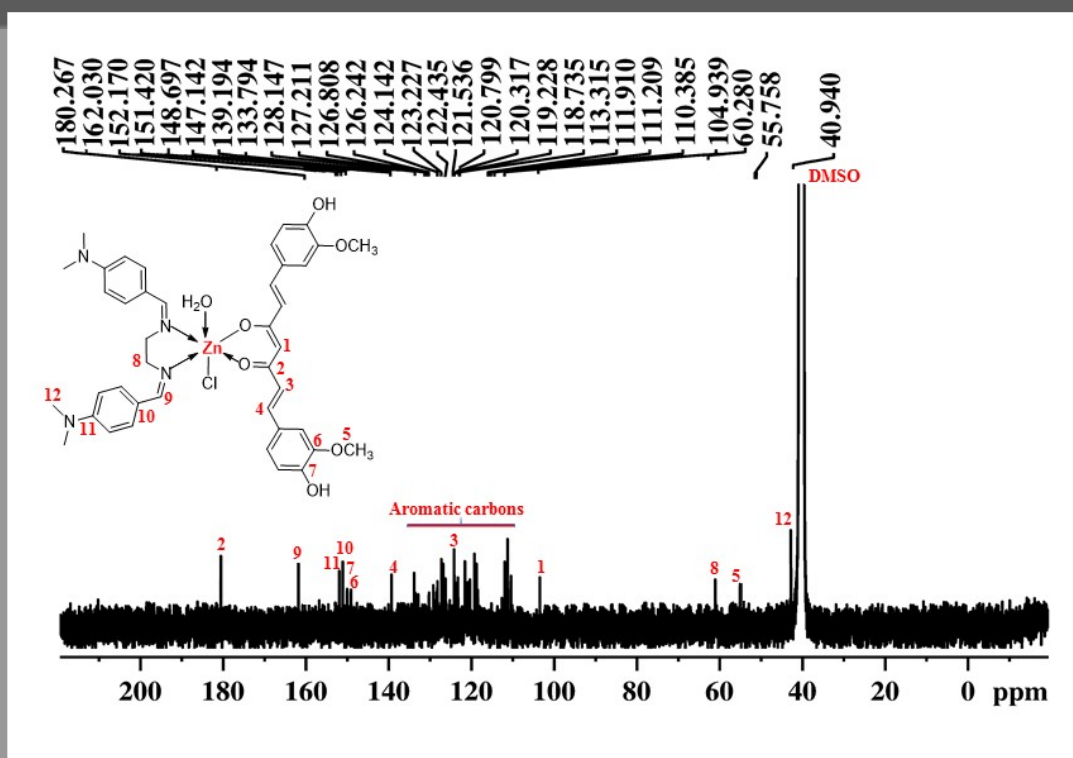

Figure S10  $^{13}\text{C}$  NMR spectrum of C3 complex

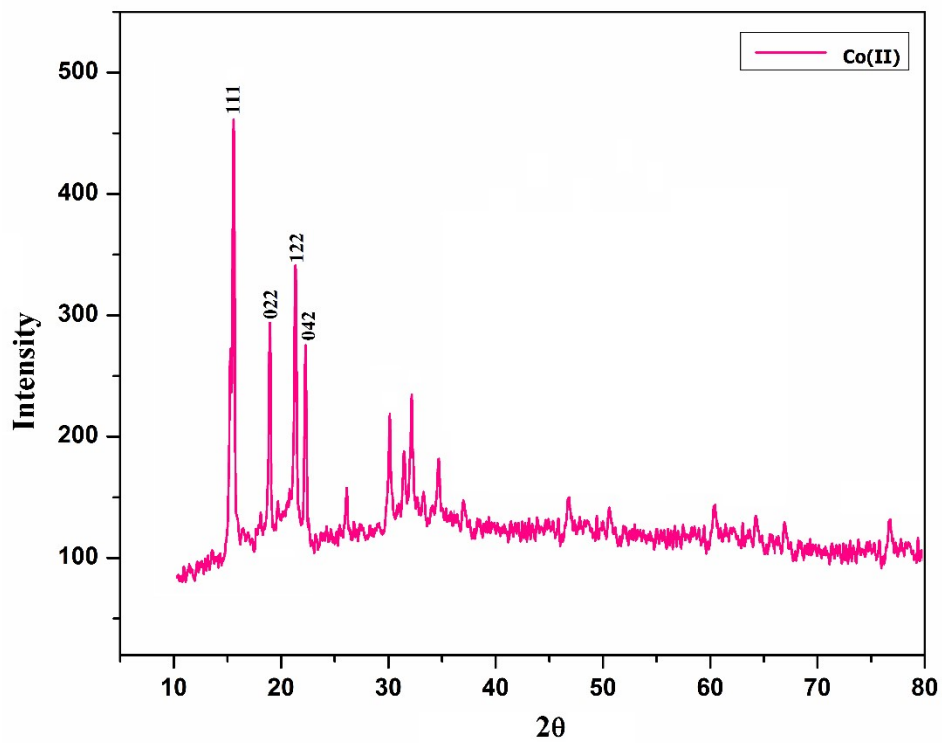

Figure S11. Powder X-ray diffraction pattern of C2 complex

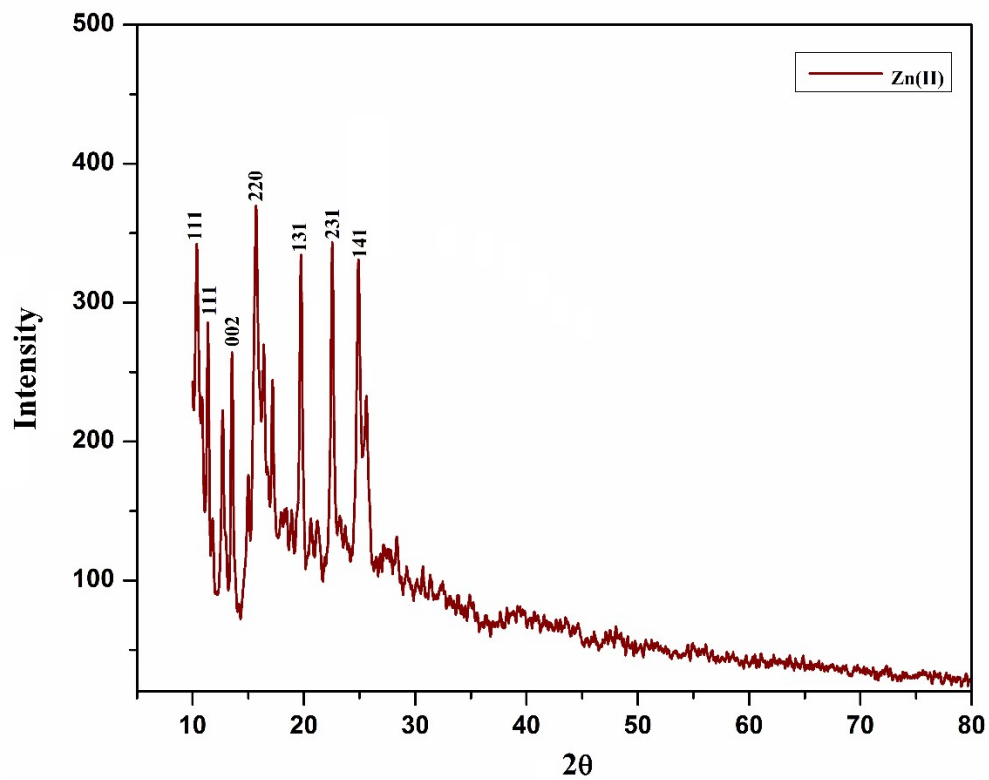

Figure S12. Powder X-ray diffraction pattern of C3 complex

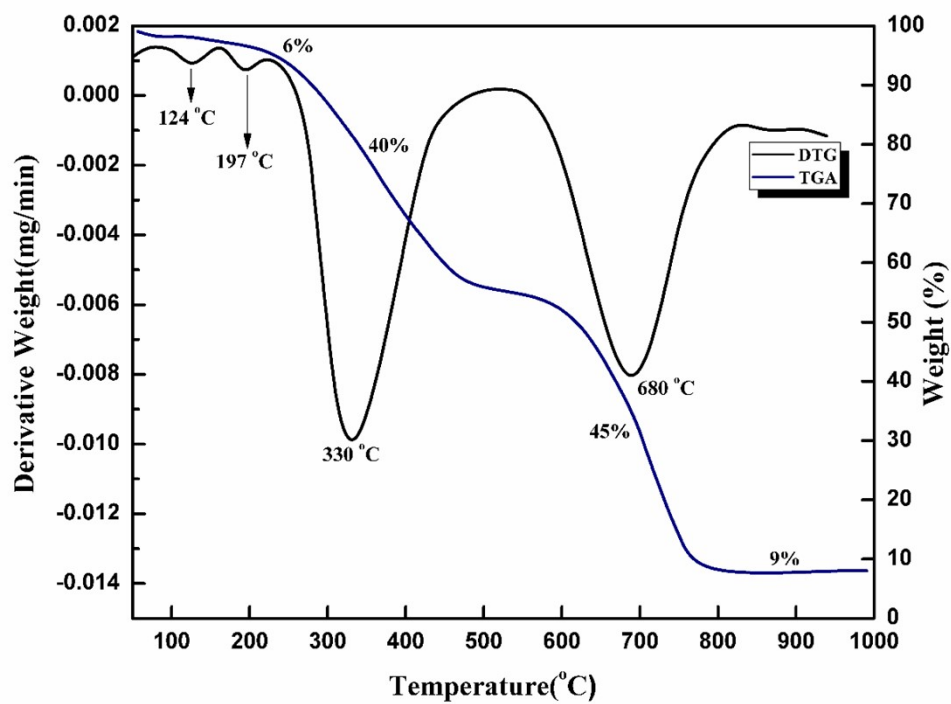

Figure S13. TGA and DTG curves of C2 complex

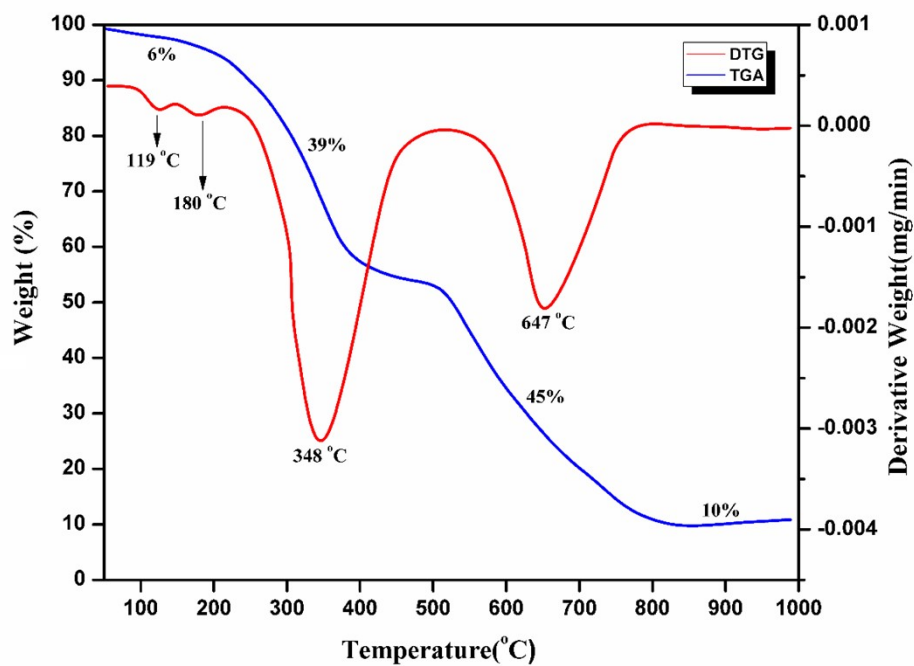

Figure S14. TGA and DTG curves of C3 complex.



**Table S1.** Detailed XRD parameters of complexes (C1-C3)

| <b>Parameter</b>    | <b>C1</b>                                                            | <b>C2</b>                                                                          | <b>C3</b>                                                            |
|---------------------|----------------------------------------------------------------------|------------------------------------------------------------------------------------|----------------------------------------------------------------------|
| Formula             | [C <sub>41</sub> H <sub>47</sub> ClN <sub>4</sub> O <sub>7</sub> Cu] | [C <sub>41</sub> H <sub>45</sub> Cl <sub>2</sub> N <sub>4</sub> O <sub>6</sub> Co] | [C <sub>41</sub> H <sub>47</sub> ClN <sub>4</sub> O <sub>7</sub> Zn] |
| Temperature (K)     | 298                                                                  | 298                                                                                | 298                                                                  |
| Wavelength          | 1.5406                                                               | 1.5406                                                                             | 1.5406                                                               |
| Radiation           | Cu-K $\alpha$                                                        | Cu-K $\alpha$                                                                      | Cu-K $\alpha$                                                        |
| Crystal system      | Orthorhombic                                                         | Monoclinic                                                                         | Monoclinic                                                           |
| Space group         | Pbca                                                                 | P21/9                                                                              | P21/c                                                                |
| Lattice             | Primitive                                                            | Primitive                                                                          | Primitive                                                            |
| Unit cell dimension |                                                                      |                                                                                    |                                                                      |
| a(A $^{\circ}$ )    | 16.49                                                                | 7.49                                                                               | 13.83                                                                |
| b(B $^{\circ}$ )    | 14.66                                                                | 22.67                                                                              | 15.66                                                                |
| c(A $^{\circ}$ )    | 16.75                                                                | 10.51                                                                              | 12.45                                                                |
| $\alpha$            | 90                                                                   | 90                                                                                 | 90                                                                   |
| $\beta$             | 90                                                                   | 91.41                                                                              | 96.03                                                                |
| $\gamma$            | 90                                                                   | 90                                                                                 | 90                                                                   |
| 2 $\theta$          | 10-80 $^{\circ}$                                                     | 10-80 $^{\circ}$                                                                   | 10-80 $^{\circ}$                                                     |

**Table S2.** Fractional inhibitory concentration index of ligand (**L**) and heteroleptic complexes (**C1-C3**) with fluconazole

| <b>Combination</b>        |      | <b>L +<br/>FLC</b> | <b>INT</b> | <b>C1 +<br/>FLC</b> | <b>INT</b> | <b>C2 +<br/>FLC</b> | <b>INT</b> | <b>C3 +<br/>FLC</b> | <b>INT</b> |
|---------------------------|------|--------------------|------------|---------------------|------------|---------------------|------------|---------------------|------------|
| <b>1:1</b>                |      |                    |            |                     |            |                     |            |                     |            |
| <i>C. albicans</i> SC5314 | FICI | 0.486              | SYN        | 0.516               | ADD        | 0.563               | ADD        | 0.188               | SYN        |
| <i>C. albicans</i> 4175   | FICI | 0.318              | SYN        | 1.031               | IND        | 1.125               | IND        | 0.625               | ADD        |
| <i>C. albicans</i> 4179   | FICI | 0.750              | ADD        | 0.750               | ADD        | 0.750               | ADD        | 0.500               | SYN        |
| <i>C. albicans</i> 4180   | FICI | 1.063              | IND        | 1.125               | IND        | 5.65                | ANT        | 1.063               | IND        |
| <i>C. albicans</i> 4251   | FICI | 0.321              | SYN        | 0.562               | ADD        | 2.125               | IND        | 0.281               | SYN        |
| <i>C. albicans</i> 4554   | FICI | 0.281              | SYN        | 1.063               | IND        | 5.65                | ANT        | 0.515               | ADD        |
| <i>C. albicans</i> 4563   | FICI | 0.500              | SYN        | 0.258               | SYN        | 0.312               | SYN        | 0.500               | SYN        |
| <i>C. albicans</i> 4576   | FICI | 0.750              | ADD        | 0.750               | ADD        | 2.250               | IND        | 0.750               | ADD        |
| <i>C. albicans</i> 4085   | FICI | 0.281              | SYN        | 0.312               | SYN        | 0.563               | ADD        | 0.141               | SYN        |
| <i>C. albicans</i> 4122   | FICI | 0.250              | SYN        | 0.531               | ADD        | 0.563               | ADD        | 0.258               | SYN        |
| <i>C. albicans</i> 4135   | FICI | 0.133              | SYN        | 0.157               | SYN        | 0.500               | SYN        | 0.157               | SYN        |

FICI: Fractional inhibitory concentration index; INT: interpretation; SYN: synergy; ADD: additive; IND: indifferent
